# Supplementary material
Source: HighWire-hosted journal article supplement (https://cmajopen-stage.highwire.org/highwire/filestream/84931/field_highwire_adjunct_files/0/2020-0082-original-submission.pdf)
Supplement: 2020-0082-original-submission.pdf [file 2020-0082-original-submission.pdf]

## Dietary gluten avoidance in Canada: results from the 2015 Canadian Community Health Survey

Adriana Mudryj<sup>1</sup> PhD, Anne Waugh<sup>1</sup> BSc, Joyce Slater<sup>1</sup> RD PhD, Donald Duerksen<sup>2</sup> MD, Charles N. Bernstein<sup>3</sup> MD, Natalie Riediger<sup>1,4\*</sup> PhD

<sup>1</sup> Department of Food and Human Nutritional Sciences, Faculty of Agricultural and Food Sciences, University of Manitoba, Winnipeg, MB R3T 2N2; <sup>2</sup> St. Boniface Hospital, Winnipeg, MB; <sup>3</sup> Internal Medicine, Health Sciences Centre, Winnipeg, MB; <sup>4</sup> Department of Community Health Sciences, Rady Faculty of Health Sciences, University of Manitoba, Winnipeg, Manitoba, Canada.

### Word Count:

Abstract: 243

Full Text: 2509

Tables: 5

**Author Contributions:** AM, NR, JS, DD and CB were involved in the design, conceptualization and analysis/interpretation of the data. AW was involved in the analysis/interpretation of the data. AM, AW, and NR were involved in drafting the manuscript. All authors have read and agreed with the material in the manuscript. We, the authors, take full responsibility for the content of the manuscript.

### \*Corresponding Author:

Natalie Riediger PhD

Assistant Professor

Department of Food and Human Nutritional Sciences

209 Human Ecology Building

Winnipeg, MB Canada

R3T 2N2

Email: [Natalie.riediger@umanitoba.ca](mailto:Natalie.riediger@umanitoba.ca)

**Funding/Support:** This study was supported by the Canadian Celiac Association's J. A. Campbell Research Award (2018) to NR and the J. A. Campbell Young Investigator Award (2019) to AM. The study was also supplemented by start-up funds to NR from the University of Manitoba. NR is also supported by a Canadian Institutes of Health Research Early Career Investigator Award (155435).

**Statement of Potential Conflict of Interest:** No potential conflict of interest was reported by the authors.

**Acknowledgements:** We gratefully acknowledge the Manitoba Research Data Centre data analyst Dr. Ian Clara for his support in data vetting. Although the research and analysis are based on data from Statistics Canada, the opinions expressed do not represent the views of Statistics Canada. We would also like to acknowledge Melissa Secord and the Canadian Celiac Association for their support of this research and in knowledge translation. Lastly, we would like to thank Dr. Luc Clair for his assistance with the matching process.

## ABSTRACT

**Background:** A gluten-free diet (GFD) is necessary in managing celiac disease, non-celiac gluten sensitivities, and wheat allergies, though individuals may also follow a GFD for discretionary reasons. We sought to 1) characterize dietary gluten avoidance using a nationally representative sample of Canadians and 2) describe and compare the location of food preparation among those who follow a GFD to those who do not.

**Methods:** We utilized cross-sectional data from the 2015 Canadian Community Health Survey, Nutrition Survey (n=20,487). Demographic variables included sex, age group, ethnicity, highest level of household education, and income adequacy. Respondents were dichotomized into those who avoid dietary gluten and those who did not. Logistic regression was used to test for predictors of a GFD.

**Results:** An estimated 1.9% of Canadians follow a GFD. Women had two times higher odds of reporting a GFD compared to men. People living in Ontario and Quebec had approximately half the odds of reporting a GFD as compared to other regions, independent of income adequacy, household education, sex, age group, and ethnicity. Canadians who followed a GFD consumed significantly fewer calories from foods prepared outside the home, specifically at restaurants, compared to both Canadians who reported no dietary avoidances or dietary avoidances other than gluten.

**Interpretation:** Results suggest that dining constraints can be difficult when eating gluten-free in Canada. The regional differences in dietary gluten avoidance suggest policies limiting access to celiac testing in Ontario may be impacting the prevalence of dietary gluten avoidance.

1 Celiac disease (CD) affects approximately 1% of the general western population<sup>1</sup>, and the  
2 prevalence appears to be increasing<sup>2</sup>. Individuals with CD, non-celiac gluten sensitivity (NCGS),  
3 and wheat allergy must restrict gluten, a protein found in cereals such as wheat, rye and barley<sup>3,4</sup>.  
4 Increasingly individuals with irritable bowel syndrome (IBS) avoid gluten, though this is thought  
5 to be due to co-occurrence of NCGS<sup>5</sup>. It has been previously estimated that the global prevalence  
6 of the gluten-free diet (GFD) adherence is rising<sup>1,6</sup>, including those for whom it is medically  
7 necessary, but also for a growing number of people who perceive it as a healthier diet option<sup>3</sup>. A  
8 GFD has been widely promoted in popular culture, rising in popularity in part, due to mass  
9 media and non-scientific reports of health and weight-loss claims, both of which are  
10 unfounded<sup>7,8</sup>. However, the extent to which this dietary fad may have penetrated Canadian  
11 culture is unclear. The majority of research on GFDs remains focused on CD, reflecting the  
12 seriousness of associated morbidities, as well as improvements to the diagnostic process<sup>9,10</sup>.  
13 However, given the multitude of reasons for adhering to a GFD, it is likely that this population  
14 will have differing demographic and socioeconomic characteristics compared to any one gluten-  
15 related disorder alone<sup>10,11,12</sup>.

16 An epidemiological description of the Canadian population avoiding dietary gluten will inform  
17 our understanding of effects of different provincial health system policies specific to gluten-  
18 related disorders. Currently, Ontario is the only province in Canada that does not cover primary  
19 care testing with IgA TTG serology, the screening test necessary for detection of CD, under its  
20 provincial health insurance plan. A description of the eating patterns among those who avoid  
21 gluten will also inform our understanding of the adequacy of the Canadian food system in  
22 responding to these dietary needs. Hyper-vigilance in regard to GFD adherence presents  
23 challenges for food consumption outside the home, when travelling, and in institutional and

1  
2  
3 24 social settings<sup>13,14</sup>, and can lead to a decreased quality of life<sup>14-17</sup>. While there has been  
4  
5 25 considerable growth in the market for gluten-free foods<sup>18</sup>, it remains unclear how current food  
6  
7 26 preparation and eating location patterns may differ between Canadians following a GFD and  
8  
9  
10 27 other Canadians. Therefore, the purpose of this study was to 1) describe the demographic and  
11  
12 28 socioeconomic characteristics of Canadians who adhere to a GFD; and 2) describe the location of  
13  
14 29 food preparation and consumption for those who follow a GFD, and test for differences between:  
15  
16  
17 30 those following a GFD, those who report no dietary avoidances, and those reporting other, non-  
18  
19 31 gluten, dietary avoidances.  
20

## 21 22 32 **METHODS**

### 23 24 33 **Data Source**

25  
26  
27 34 We used data from the 2015 Canadian Community Health Survey (CCHS) Nutrition Survey. The  
28  
29 35 main objective of the 2015 CCHS Nutrition Survey was to gather reliable, detailed and timely  
30  
31 36 information on the dietary intake and nutritional well-being of Canadians to inform future  
32  
33 37 government and health policies<sup>19</sup>. The 2015 CCHS included a representative sample (n=20,487)  
34  
35 38 covering approximately 98% of the Canadian population, > 1-year-old, residing in the ten  
36  
37 39 provinces. A detailed description of the 2015 CCHS survey sampling frame, survey, and  
38  
39 40 collection methods are described elsewhere<sup>18</sup>. Briefly, the CCHS Nutrition Survey included a  
40  
41 41 questionnaire component, as well as a 24-hour dietary recall, which followed the automated  
42  
43 42 multiple pass method<sup>19</sup>.  
44  
45  
46

### 47 48 43 **Variables**

49  
50 44 Adherence to a GFD was defined using self-reported responses to the question “*Do you*  
51  
52 45 *completely exclude any of the following foods from your diet? By completely exclude, we mean*  
53  
54 46 *you never eat it on its own or as part of a prepared dish*”. Responses included meat (beef, pork,  
55  
56  
57  
58  
59  
60

1  
2  
3 47 lamb, etc.); poultry (chicken, turkey, duck, etc.); fish and shellfish; eggs, dairy products (milk,  
4  
5 48 cheese, etc.); and gluten sources (wheat, barley, triticale, etc.). Adherence to a GFD was defined  
6  
7  
8 49 as an affirmative response to avoidance of gluten sources<sup>19</sup>.

9  
10 50 Dietary gluten avoidance was described according to sex, age group, province or region,  
11  
12 51 household education, income adequacy, and ethnicity. *Sex* was dichotomized as male and female.  
13  
14 52 *Age groups* were categorized as 2-17 years old, 18–49 years old, and  $\geq 50$  y. *Region* was grouped  
15  
16  
17 53 as British Columbia, the Prairies (Alberta, Saskatchewan and Manitoba), Ontario, Quebec, and  
18  
19 54 the Atlantic provinces (New Brunswick, Newfoundland, Nova Scotia and Prince Edward  
20  
21  
22 55 Island)<sup>20</sup> *Highest level of household education* was categorized as less than secondary school  
23  
24 56 graduation, some post-secondary, and post-secondary graduation or diploma/equivalent.  
25  
26 57 *Household income adequacy*, as defined by Statistics Canada using total household income and  
27  
28 58 number of individuals in the household, was classified into four categories: lowest to lower-  
29  
30  
31 59 middle income group, middle to upper-middle income group, and highest income group.  
32  
33 60 *Ethnicity* was categorized as white, and racialized or Indigenous, based on the categorizations  
34  
35 61 collected in the survey<sup>19</sup>. While missing data for income adequacy was imputed by Statistics  
36  
37  
38 62 Canada, other missing data was minimal and therefore ignored.

### 40 63 *Dietary Avoidance Groups*

41  
42 64 For analysis related to location of food preparation and consumption (objective 2), respondents  
43  
44 65 were divided into three, mutually exclusive groups based on dietary avoidances: respondents  
45  
46 66 who avoid gluten, respondents who have  $\geq 1$  dietary avoidance other than gluten, and  
47  
48  
49 67 respondents who report no dietary avoidances. Groups were divided in this way to more fairly  
50  
51 68 compare dietary gluten avoidance to other dietary avoidances, rather than no dietary avoidances  
52  
53  
54 69 alone.

70

### 71 *Location of Food Consumption*

72 Food consumption location was collected as part of the 24-hour dietary recall. Importantly, we  
73 wanted to distinguish between location of food *consumption* and the location of food  
74 *preparation*, as they are not necessarily the same. For example, any food that was ordered in or  
75 taken out, would be classified as prepared outside of the home, but would be consumed inside  
76 the home. As part of the 24-hour dietary recall, respondents were asked directly where the meal  
77 or snack (again, all foods and/or beverages consumed at a single eating occasion) were  
78 consumed. As such, all calories reported in the 24-hour dietary recall were attributed to one of  
79 three consumption locations: home, other, and not stated. *Home* included an individual's home or  
80 someone else's home. *Other* locations included fast food/pizza restaurants, take-out, restaurants  
81 with server; bar/tavern/lounge; vending machine; restaurants with no additional information;  
82 cafeteria not at school; cafeteria at school; child care centre; family/adult care centre; other;  
83 grocery; corner or other types of stores; or at work. Any meal or snack where a location was not  
84 reported was categorized as *not stated*.

### 85 *Location of Food Preparation*

86 Respondents were also asked directly where the meal or snack originated. Preparation is  
87 especially important for dietary gluten avoidance, as cross-contamination is a concern. Location  
88 of food preparation was categorized into five groups: *home recipe/homemade*, *restaurant*  
89 (including fast food), *other* (e.g. from a dry mix, frozen, commercially prepared), *no preparation*  
90 *required*, and *information not available*. Again, we calculated total calories consumed that were  
91 attributed to each location of preparation.

### 92 *Statistical Analysis*

1  
2  
3 93 *Objective 1*  
4

5 94 The prevalence of dietary gluten avoidance according to the previously listed sociodemographic  
6  
7  
8 95 variables was described and chi-square analyses were used to test for differences within  
9  
10 96 categories. Logistic regression was used to test for associations of socio-demographic variables  
11  
12 97 as predictors of following a GFD.  
13

14  
15 98 *Objective 2*  
16

17 99 Pregnant or breastfeeding respondents were excluded from this analysis given known effects on  
18  
19 100 energy needs. We used post-estimation commands to test for differences in percent calories  
20  
21 101 consumed for both food consumption location and food preparation location, according to the  
22  
23 102 three dietary avoidance groups. We also determined the prevalence of consuming *only* food  
24  
25 103 prepared at home according to each of the three dietary avoidance groups and tested for  
26  
27 104 differences using post-estimation commands.  
28  
29

30  
31 105 Given known differences in the sample who avoid gluten as compared to those who do not avoid  
32  
33 106 gluten, we employed coarsened exact matching to correct for potential bias due to endogeneity<sup>21</sup>.  
34

35 107 Canadians who reported a GFD were matched by age, sex, region and household education with  
36  
37 108 Canadians reporting  $\geq 1$  dietary avoidance other than gluten. This process resulted in a final  
38  
39 109 matched sample of 2,746, with few respondents who avoid dietary gluten being pruned. Again,  
40  
41 110 we tested for differences in percent calories consumed for both food consumption location and  
42  
43 111 food preparation location between the two matched groups using post-estimation commands.  
44  
45

46  
47 112 All analyses were performed using PASW SPSS Statistics, IBM, version 18 and STATA  
48  
49 113 Statistical Analysis Software, RTI International, version 14. Given the complex survey design of  
50  
51 114 the CCHS, we utilized the bootstrapping method to estimate standard errors, coefficients of  
52  
53  
54 115 variation and confidence intervals<sup>18</sup>. Significance was set at  $p < 0.05$ .  
55  
56  
57  
58  
59  
60

1  
2  
3 116 **Ethics Approval**  
4

5 117 All research was conducted at the Manitoba Research Data Centre, and the Social Sciences and  
6  
7 118 Humanities Research Council of Canada approved our analysis, precluding the need for  
8  
9  
10 119 institutional Research Ethics Board approval.  
11

12 120 **RESULTS**  
13

14 121 **Prevalence of dietary gluten avoidance and demographics**  
15

16  
17 122 A total of 488 respondents self-reported dietary gluten avoidance, indicating an overall estimated  
18  
19 123 prevalence of 1.9% among Canadians, with a higher prevalence among women than men (2.5%  
20  
21 124 vs. 1.3%, respectively) (**Table 1**). Gluten avoidance was more prevalent among Canadians 18-49  
22  
23  
24 125 years, compared with children and adolescents 2-17 years old. Ontario and Quebec had similar  
25  
26 126 prevalence, which was the lowest in Canada, and residents were approximately half as likely to  
27  
28 127 follow a GFD compared to Atlantic Canadians (**Table 2**). Education, income and ethnicity were  
29  
30  
31 128 not significant independent predictors of following a GFD.  
32

33 129 **Location of food consumption**  
34

35 130 Respondents consumed most of their calories at home (74-81% of total calories), regardless of  
36  
37 131 dietary exclusions (**Table 3**). However, respondents who avoided dietary gluten consumed  
38  
39  
40 132 significantly more calories at home and significantly fewer calories from other locations when  
41  
42 133 compared to respondents reporting any other dietary avoidance, as well as those with no dietary  
43  
44 134 exclusions. Results from matched analysis revealed similar significant differences (data not  
45  
46  
47 135 shown). Almost half of respondents who followed a GFD consumed foods only at home  
48  
49 136 (45.7%), compared with 36.8% and 37.8% of respondents who reported  $\geq 1$  dietary avoidance  
50  
51 137 other than gluten and no dietary avoidances, respectively (**Table 4**).  
52

53  
54 138  
55  
56  
57  
58  
59  
60



### 139 **Location of food preparation**

140 Percent daily energy intake from homemade/home prepared recipes ranged from 11.7-12.6% of  
141 total calories for the three groups. Percent calories consumed from home-prepared foods did not  
142 differ significantly among the three groups, while the percent daily energy intake from foods  
143 prepared at restaurants (including fast food establishments) was significantly lower (2.0%)  
144 among Canadians who avoid dietary gluten compared to those with other avoidances (6.7%) and  
145 those with none (6.4%) (**Table 5**). Again, results from matched analysis revealed similar  
146 significant differences (data not shown).

### 147 **DISCUSSION**

148 We report an estimated 1.9% prevalence of Canadians who avoid dietary gluten. This prevalence  
149 likely includes individuals with CD, wheat allergy, NCGS, as well as individuals excluding  
150 gluten in the management of IBS or for reasons related to dietary trends. Unfortunately, the  
151 survey did not allow for determination of the reason for gluten avoidance. Our finding is  
152 reasonable given the 1.0% estimated prevalence of CD<sup>1</sup>, the approximately 0.3-0.4% of  
153 Canadians with wheat allergies<sup>23</sup>, and the prevalence of NCGS, which ranges from 0.6-6%<sup>24</sup>.  
154 Though at present, there remain many undiagnosed patients with CD, and therefore CD  
155 prevalence is less than this<sup>22</sup>. American data indicate a similar prevalence of gluten avoidance,  
156 which in 2014 was estimated at 2.1%<sup>25</sup>. Interestingly, the prevalence in Australia is considerably  
157 higher, which showed 3.8% total gluten avoidance, and upwards of 24.2% partial avoidance<sup>26</sup>;  
158 this may be partially attributed to the increasing popularity of FODMAP diets, originally  
159 theorized in Australia<sup>27,28</sup>.

160 Canadian women were twice as likely as men to follow a GFD, similar to previous reports of  
161 CD, showing a female to male ratio of 2:1 or 3:1<sup>10,11</sup>, and NCGS, which also appears to be

1  
2  
3 162 female predominated<sup>27</sup>. In the present study, white participants had a higher proportion of gluten  
4  
5 163 avoidance as compared to racialized or Indigenous participants, also similar to previous reports  
6  
7  
8 164 <sup>29,30</sup>; however, ethnicity was no longer significant after adjusting for other variables. CD was  
9  
10 165 originally thought to be more prominent among Europeans, however more recent studies have  
11  
12 166 emphasized its ethnic diversity and disproven this theory <sup>31,32</sup>. Income adequacy and education  
13  
14  
15 167 were not significantly associated with gluten avoidance.

16  
17  
18 168 In both Ontario and Quebec, the likelihood of adhering to a GFD was approximately half of what  
19  
20 169 it was in the Atlantic provinces, which had the highest prevalence at 2.9%. The lower prevalence  
21  
22 170 of adherence to a GFD in Quebec and higher prevalence in the Atlantic provinces, may be  
23  
24 171 reflective of provincial rates in IBS<sup>33</sup>, which suggests that those avoiding gluten includes a  
25  
26  
27 172 substantial proportion of people with IBS<sup>34</sup>. Limited access to serological testing for CD in  
28  
29 173 Ontario through lack of Provincial funding may be contributing to disproportionately higher  
30  
31 174 cases of undiagnosed CD in that province, and hence, a lower prevalence of GFD. Indeed, two of  
32  
33  
34 175 the authors (DD and CB), gastroenterologists in Manitoba, regularly provide serological testing  
35  
36 176 for patients from Ontario. This is particularly concerning given that approximately 39% of the  
37  
38 177 Canadian population resides in Ontario. Importantly, tTG is a highly reliable test and is  
39  
40  
41 178 recommended as the initial test to screen individuals for CD<sup>35</sup>, a condition which overlaps with  
42  
43 179 many other conditions, including IBS<sup>34</sup>. The lack of funding for this test may contribute to the  
44  
45 180 trivialization of CD by both the public and medical professionals. Anecdotal evidence among  
46  
47  
48 181 people with CD suggests skepticism among physicians when first seeking medical help. This  
49  
50 182 “health-care gaslighting”, especially common among women, whose symptoms may be  
51  
52 183 downplayed or ignored<sup>36</sup>, leads to frustration and may contribute to the often long period of time  
53  
54 184 before receiving a correct diagnosis<sup>37</sup>.

1  
2  
3 185 Our results suggest that it is likely that the majority of Canadians reporting dietary gluten  
4  
5 186 avoidance are vigilant in their avoidance. Indeed, the differences in the caloric profile by eating  
6  
7 187 location/preparation of Canadians following a GFD indicate the degree of caution required,  
8  
9 188 particularly from lack of control and trust over the preparation process<sup>38</sup>. These concerns were  
10  
11 189 echoed in our engagement with patients in terms of the variation in attentiveness to which food  
12  
13 190 service establishments respond to their dietary needs<sup>39</sup>.

14  
15  
16  
17 191 One of the strengths of this study is the use of CCHS data, which includes a large and  
18  
19 192 representative sample size, making it the best available data of the Canadian population currently  
20  
21 193 available. Nevertheless, the CCHS only included data from the ten provinces, excluding people  
22  
23 194 from the territories, on-reserves, settlements, full-time members of the Canadian forces, and  
24  
25 195 individuals who are institutionalized. Another limitation is that the GFD was self-reported and  
26  
27 196 we cannot determine the proportion of the sample who avoid dietary gluten due to CD, non-  
28  
29 197 celiac gluten sensitivity, wheat allergy, or other reasons. Lastly, we did not apply the National  
30  
31 198 Cancer Institute method<sup>40</sup> to estimate *usual* energy intake according to location of preparation or  
32  
33 199 location, as compared to *average* intake, which requires the inclusion of the second dietary  
34  
35 200 recall, due to the small sample who reported dietary gluten avoidance.  
36  
37  
38  
39

## 40 201 **CONCLUSIONS**

41  
42  
43 202 This study offers a foundational description of dietary gluten avoidance in Canada. Provincial  
44  
45 203 differences in access to CD testing may explain some regional differences in dietary gluten  
46  
47 204 avoidance reported here and provide strong evidence for changes in policy to improve access to  
48  
49 205 CD testing in Ontario. Results from this study may also provide credibility to Canadians who  
50  
51 206 follow a GFD, as the number of Canadians reporting dietary gluten avoidance did not greatly  
52  
53  
54  
55  
56  
57  
58  
59  
60

1  
2  
3  
4  
5  
6  
7  
8  
9  
10  
11  
12  
13  
14  
15  
16  
17  
18  
19  
20  
21  
22  
23  
24  
25  
26  
27  
28  
29  
30  
31  
32  
33  
34  
35  
36  
37  
38  
39  
40  
41  
42  
43  
44  
45  
46  
47  
48  
49  
50  
51  
52  
53  
54  
55  
56  
57  
58  
59  
60

207 exceed the estimated prevalence of CD, wheat allergies, and NCGS. There are likely few  
208 Canadians following a GFD for discretionary reasons.

209

Confidential

**References:**

1. Lebwohl B, Sanders DS, Green PH. Coeliac disease. *The Lancet*. 2018 Jan 6;391(10115):70-81.
2. King JA, Jeong J, Underwood FE, Quan J, Panaccione N, Windsor JW, Coward S, deBruyn J, Ronksley PE, Shaheen AA, Quan H. Incidence of Celiac Disease Is Increasing Over Time: A Systematic Review and Meta-analysis. *American Journal of Gastroenterology*. 2020 Feb 10.
3. Niewinski MM. Advances in celiac disease and gluten-free diet. *Journal of the American Dietetic Association*. 2008 Apr 1;108(4):661-72.
4. Ludvigsson JF, Leffler DA, Bai JC, Biagi F, Fasano A, Green PH, Hadjivassiliou M, Kaukinen K, Kelly CP, Leonard JN, Lundin KE. The Oslo definitions for coeliac disease and related terms. *Gut*. 2013 Jan 1;62(1):43-52.
5. Rej A, Sanders DS. Gluten-free diet and its 'cousins' in irritable bowel syndrome. *Nutrients*. 2018 Nov;10(11):1727.
6. Reilly NR. The gluten-free diet: recognizing fact, fiction, and fad. *The Journal of pediatrics*. 2016 Aug 1;175:206-10.
7. Gaesser GA, Gluten S, Diet F. Imprudent Dietary Advice for the General Population. *Academy of Nutrition and Dietetics*. 2012;9.
8. Marcason W. Is there evidence to support the claim that a gluten-free diet should be used for weight loss?. *Journal of the Academy of Nutrition and Dietetics*. 2011 Nov 1;111(11):1786. doi: 10.1016/j.jada.2011.09.030.
9. Di Sabatino A, Corazza GR. Coeliac disease. *The Lancet*. 2009 Apr 25;373(9673):1480-93.
10. Tack GJ, Verbeek WH, Schreurs MW, Mulder CJ. The spectrum of celiac disease: epidemiology, clinical aspects and treatment. *Nature reviews Gastroenterology & hepatology*. 2010 Apr;7(4):204.
11. Ciccocioppo R, Kruzliak P, Cangemi GC, Pohanka M, Betti E, Lauret E, Rodrigo L. The spectrum of differences between childhood and adulthood celiac disease. *Nutrients*. 2015 Oct;7(10):8733-51.
12. Thomas HJ, Ahmad T, Rajaguru C, Barnardo M, Warren BF, Jewell DP. Contribution of histological, serological, and genetic factors to the clinical heterogeneity of adult-onset coeliac disease. *Scandinavian journal of gastroenterology*. 2009 Jan 1;44(9):1076-83.
13. Mazzone L, Reale L, Spina M, Guarnera M, Lionetti E, Martorana S, Mazzone D. Compliant gluten-free children with celiac disease: an evaluation of psychological distress. *BMC pediatrics*. 2011 Dec;11(1):46.
14. Wolf RL, Lebwohl B, Lee AR, Zybert P, Reilly NR, Cadenhead J, Amengual C, Green PH. Hypervigilance to a gluten-free diet and decreased quality of life in teenagers and adults with celiac disease. *Digestive diseases and sciences*. 2018 Jun 1;63(6):1438-48.
15. Silvester JA, Weiten D, Graff LA, Walker JR, Duerksen DR. Living gluten-free: adherence, knowledge, lifestyle adaptations and feelings towards a gluten-free diet. *Journal of Human Nutrition and Dietetics*. 2016 Jun;29(3):374-82.
16. Zarkadas M, Dubois S, MacIsaac K, Cantin I, Rashid M, Roberts KC, La Vieille S, Godefroy S, Pulido OM. Living with coeliac disease and a gluten-free diet: a Canadian perspective. *Journal of Human Nutrition and Dietetics*. 2013 Feb;26(1):10-23.

17. Olsson C, Lyon P, Hörnell A, Ivarsson A, Sydner YM. Food that makes you different: the stigma experienced by adolescents with celiac disease. *Qualitative health research*. 2009 Jul;19(7):976-84.
18. Agriculture and Agri-Foods Canada. "Gluten-Free" Claims in the Marketplace [Internet]. 2017 Nov. [cited 2019 Dec 5] Available from: <http://www.agr.gc.ca/eng/industry-markets-and-trade/canadian-agri-food-sector-intelligence/processed-food-and-beverages/trends-and-market-opportunities-for-the-food-processing-sector/gluten-free-claims-in-the-marketplace/?id=1397673574797>.
19. Statistics Canada. Canadian Community Health Survey-Nutrition (CCHS) [Internet]. 2017 June [cited 2019 July 29] Available from: <http://www23.statcan.gc.ca/imdb/p2SV.pl?Function=getSurvey&SDDS=5049>.
20. Slater J, Mudryj AN. Nurturing future generations: household food practices of Canadian children and family meal participation. *Canadian Journal of Dietetic Practice and Research*. 2016 Sep;77(3):113-8.
21. Blackwell M, Iacus S, King G, Porro G. cem: Coarsened exact matching in Stata. *The Stata Journal*. 2009 Dec;9(4):524-46.
22. Catassi C, Kryszak D, Louis-Jacques O, Duerksen DR, Hill I, Crowe SE, Brown AR, Procaccini NJ, Wonderly BA, Hartley P, Moreci J. Detection of celiac disease in primary care: a multicenter case-finding study in North America. *American Journal of Gastroenterology*. 2007 Jul 1;102(7):1454-60.
23. Allergy, Genes and Environment Network. Canadian Food Allergy Prevalence [Internet]. 2017 July [cited 2021 Jan 12] Available from: Available at: <https://allergen-nce.ca/wp-content/uploads/Canadian-food-allergy-prevalence-Jul-2017.pdf>
24. Casella G, Villanacci V, Di Bella C, Bassotti G, Bold J, Rostami K. Non celiac gluten sensitivity and diagnostic challenges. *Gastroenterology and hepatology from bed to bench*. 2018;11(3):197.
25. Volta U, Bardella MT, Calabrò A, Troncone R, Corazza GR. An Italian prospective multicenter survey on patients suspected of having non-celiac gluten sensitivity. *BMC medicine*. 2014 Dec 1;12(1):85.
26. Unalp-Arida A, Ruhl CE, Brantner TL, Everhart JE, Murray JA. Less hidden celiac disease but increased gluten avoidance without a diagnosis in the United States: findings from the National Health and Nutrition Examination Surveys from 2009 to 2014. *In Mayo Clinic Proceedings* 2017 Jan 1 (Vol. 92, No. 1, pp. 30-38). Elsevier.
27. Potter MD, Jones MP, Walker MM, Koloski NA, Keely S, Holtmann G, Talley AC NJ. Incidence and prevalence of self-reported non-coeliac wheat sensitivity and gluten avoidance in Australia. *Medical Journal of Australia*. 2020 Jan 7.
28. Bellini M, Tonarelli S, Nagy AG, Pancetti A, Costa F, Ricchiuti A, de Bortoli N, Mosca M, Marchi S, Rossi A. Low FODMAP Diet: Evidence, Doubts, and Hopes. *Nutrients*. 2020 Jan;12(1):148.
29. DiGiacomo DV, Tennyson CA, Green PH, Demmer RT. Prevalence of gluten-free diet adherence among individuals without celiac disease in the USA: results from the Continuous National Health and Nutrition Examination Survey 2009–2010. *Scandinavian journal of gastroenterology*. 2013 Aug 1;48(8):921-5.
30. Kang JY, Kang AH, Green A, Gwee KA, Ho KY. Systematic review: worldwide variation in the frequency of coeliac disease and changes over time. *Alimentary pharmacology & therapeutics*. 2013 Aug;38(3):226-45.

- 1
  - 2
  - 3
  - 4
  - 5
  - 6
  - 7
  - 8
  - 9
  - 10
  - 11
  - 12
  - 13
  - 14
  - 15
  - 16
  - 17
  - 18
  - 19
  - 20
  - 21
  - 22
  - 23
  - 24
  - 25
  - 26
  - 27
  - 28
  - 29
  - 30
  - 31
  - 32
  - 33
  - 34
  - 35
  - 36
  - 37
  - 38
  - 39
  - 40
  - 41
  - 42
  - 43
  - 44
  - 45
  - 46
  - 47
  - 48
  - 49
  - 50
  - 51
  - 52
  - 53
  - 54
  - 55
  - 56
  - 57
  - 58
  - 59
  - 60
31. Mardini HE, Westgate P, Grigorian AY. Racial differences in the prevalence of celiac disease in the US population: National Health and Nutrition Examination Survey (NHANES) 2009–2012. *Digestive Diseases and Sciences*. 2015 Jun 1;60(6):1738-42.
32. Pereira MA, Ortiz-Agostinho CL, Nishitokukado I, Sato MN, Damião AO, Alencar ML, Abrantes-Lemos CP, Cançado EL, de Brito T, Ioshii SO, Valarini SB. Prevalence of celiac disease in an urban area of Brazil with predominantly European ancestry. *World Journal of Gastroenterology: WJG*. 2006 Oct 28;12(40):6546.
33. Fedorak RN, Vanner SJ, Paterson WG, Bridges RJ. Canadian Digestive Health Foundation Public Impact Series 3: irritable bowel syndrome in Canada. Incidence, prevalence, and direct and indirect economic impact. *Canadian Journal of Gastroenterology and Hepatology*. 2012;26(5):252-6.
34. Wilkins T, Pepitone C, Alex B, Schade RR. Diagnosis and management of IBS in adults. *American family physician*. 2012 Sep 1;86(5):419-26.
35. Rubio-Tapia A, Hill ID, Kelly CP, Calderwood AH, Murray JA. American College of Gastroenterology clinical guideline: diagnosis and management of celiac disease. *The American journal of gastroenterology*. 2013 May;108(5):656.
36. Werner A, Isaksen LW, Malterud K. 'I am not the kind of woman who complains of everything': Illness stories on self and shame in women with chronic pain. *Social science & medicine*. 2004 Sep 1;59(5):1035-45.
37. Cranney A, Zarkadas M, Graham ID, Butzner JD, Rashid M, Warren R, Molloy M, Case S, Burrows V, Switzer C. The Canadian celiac health survey. *Digestive diseases and sciences*. 2007 Apr 1;52(4):1087-95.
38. Falcomer AL, Santos Araújo L, Farage P, Santos Monteiro J, Yoshio Nakano E, Puppini Zandonadi R. Gluten contamination in food services and industry: A systematic review. *Critical Reviews in Food Science and Nutrition*. 2020 Feb 4;60(3):479-93.
39. Cureton P. Gluten-Free Dining Out: Is it Safe?. *Practical Gastroenterology*. 2006 Nov;30(11):61.
40. National Cancer Institute. Usual Dietary Intakes: The NCI Method [Internet]. [cited 2020 March 24] Available from: <https://epi.grants.cancer.gov/diet/usualintakes/method.html>

**Table 1.** Demographic characteristics of Canadians who avoid dietary gluten based on results from the Canadian Community Health Survey, 2015.

| Characteristic (n)                          | Percent dietary gluten avoidance (SE) | p-value |
|---------------------------------------------|---------------------------------------|---------|
| <b>Sex</b>                                  |                                       |         |
| Male (n=9,744)                              | 1.3 (0.2)                             | <0.001  |
| Female (n=10,733)                           | 2.5 (0.3)                             |         |
| <b>Age</b>                                  |                                       |         |
| 2-17 y (n=5,839)                            | 0.9 (0.2)                             | <0.001  |
| 18 to 49 y (n=6,543)                        | 2.3 (0.4)                             |         |
| ≥ 50 y (n=7,724)                            | 1.9 (0.2)                             |         |
| <b>Province/region</b>                      |                                       |         |
| Atlantic Provinces (n=5,308)                | 2.9 (0.4)                             | <0.01   |
| Quebec (n=3,204)                            | 1.5 (0.3)                             |         |
| Ontario (n=4,228)                           | 1.5 (0.3)                             |         |
| Prairies (n=5,146)                          | 2.4 (0.3)                             |         |
| British Columbia (n=2,591)                  | 2.7 (0.7)                             |         |
| <b>Household education</b>                  |                                       |         |
| < Secondary School (n=1,780)                | 1.6 (0.5)                             |         |
| Post-secondary School (n=3,754)             | 1.5 (0.3)                             |         |
| Post-secondary degree or diploma (n=14,903) | 2.0 (0.2)                             |         |
| <b>Ethnicity</b>                            |                                       |         |
| White (n=16,127)                            | 2.1 (0.2)                             | <0.001  |
| Racialized or Indigenous (n=3,369)          | 1.4 (0.5)                             |         |
| <b>Household income adequacy</b>            |                                       |         |
| Low-Low Middle (n=1,318)                    | 1.6 (0.5)                             | 0.889   |
| Upper to Upper Middle (n=8,496)             | 1.5 (0.2)                             |         |
| Highest (n=10,663)                          | 2.2 (0.3)                             |         |

SE, standard error



**Table 2.** Odds Ratio (95% CI) for excluding dietary gluten.

| Characteristic                   | Odds ratio (95% CI) |
|----------------------------------|---------------------|
| <b>Sex</b>                       |                     |
| Men                              | Reference           |
| Women                            | 2.08 (1.32-3.27)**  |
| <b>Age (y)</b>                   |                     |
| 2 to 17 y                        | 0.38 (0.23-0.63)*** |
| 18 to 49 y                       | Reference           |
| ≥ 50 y                           | 0.80 (0.54-1.17)    |
| <b>Province/region</b>           |                     |
| Atlantic Provinces               | Reference           |
| Quebec                           | 0.52 (0.31-0.87)*   |
| Ontario                          | 0.55 (0.32-0.94)*   |
| Prairies                         | 0.84 (0.54-1.29)    |
| British Columbia                 | 0.99 (0.51-1.95)    |
| <b>Household education</b>       |                     |
| < Secondary School               | Reference           |
| Post-secondary School            | 0.83 (0.35-1.93)    |
| Post-secondary degree or diploma | 1.14 (0.50-2.62)    |
| <b>Ethnicity</b>                 |                     |
| White                            | Reference           |
| Racialized or Indigenous         | 0.68 (0.33-1.43)    |
| <b>Household income adequacy</b> |                     |
| Low-Low Middle                   | Reference           |
| Upper to Upper Middle            | 0.83 (0.35-1.96)    |
| Highest                          | 1.21 (0.52-2.86)    |

\*  $p < 0.05$ , \*\*  $p < 0.01$ , \*\*\*  $p < 0.001$

**Table 3.** Percent total calories by type of food consumption location according to type of dietary avoidance(s).

|                                                                         | Percent total kcal consumed (SE) |                              |            |
|-------------------------------------------------------------------------|----------------------------------|------------------------------|------------|
|                                                                         | At home <sup>a</sup>             | Other locations <sup>b</sup> | Not stated |
| Respondents who avoid dietary gluten (n=488)                            | 81.1 (2.7)                       | 15.4 (2.0)                   | 3.6 (1.9)  |
| Respondents reporting $\geq 1$ dietary avoidance <sup>c</sup> (n=2,653) | 75.3 (1.2)**                     | 23.0 (1.2)**                 | 1.7 (0.4)  |
| Respondents who report no dietary avoidances (n=17,336)                 | 74.9 (0.5)*                      | 23.0 (0.5)**                 | 2.1 (0.2)  |

SE, standard error

<sup>a</sup> Home refers to foods prepared at the participant's home or at someone else's home

<sup>b</sup> All other locations refer to the following locations: fast food/pizza restaurants; take-out; restaurants with waiter/waitress; bar/tavern/lounge; vending machine; restaurants with no additional information; cafeteria not at school; cafeteria at school; child care centre; family/adult care centre; other; grocery; corner or other types of stores; or at work.

<sup>c</sup> With the exception of gluten.

\*  $p < 0.05$ , \*\*  $p < 0.01$ , \*\*\*  $p < 0.001$  in comparison with respondents who avoid dietary gluten.

**Table 4.** Prevalence of exclusive at-home food consumption<sup>a</sup> according to type of dietary avoidance(s).

| <b>Characteristic</b>                                                                | <b>Percent (SE)</b> |
|--------------------------------------------------------------------------------------|---------------------|
| Respondents who avoid dietary gluten (n=488)                                         | 45.7 (0.5)          |
| Respondents who report one or more dietary avoidances other than gluten (n= n=2,653) | 36.8 (0.2)**        |
| Respondents who report no dietary avoidances (n=17,336)                              | 37.8 (0.1)**        |

SE, standard error

<sup>a</sup> Home refers to foods prepared at the participant's home or at someone else's home

\*\*  $p < 0.01$  in comparison with respondents who avoid dietary gluten.

Confidential

**Table 5.** Percent total calories for type of food preparation according to type of dietary avoidance(s).

|                                                                         | Percent total kcal consumed (SE) |                          |                    |                         |                           |
|-------------------------------------------------------------------------|----------------------------------|--------------------------|--------------------|-------------------------|---------------------------|
|                                                                         | Home recipe/homemade             | Restaurants <sup>a</sup> | Other <sup>b</sup> | No preparation required | Information not available |
| Respondents who avoid dietary gluten (n=488)                            | 12.3 (1.3)                       | 2.0 (0.5)                | 10.5 (2.2)         | 54.9 (2.3)              | 20.4 (2.3)                |
| Respondents reporting ≥ 1 dietary avoidance other than gluten (n=2,653) | 11.7 (0.6)                       | 6.7 (0.6)***             | 11.4 (0.6)         | 49.3 (0.8)**            | 20.9 (0.7)                |
| Respondents who report no dietary avoidances (n=17,336)                 | 12.6 (0.3)                       | 6.4 (0.2)***             | 12.1 (0.3)         | 47.5 (0.3)*             | 21.3 (0.3)                |

SE, standard error

<sup>a</sup> Includes fast food establishments

<sup>b</sup> Includes dry mix, frozen or commercially packaged foods

\* p < 0.05, \*\* p < 0.01, \*\*\* p<0.001 in comparison with respondents who avoid dietary gluten.

Confidential
